# Supplementary material
Source: publisher figshare collection journal article supplement (https://karger.figshare.com/ndownloader/files/37411996)
Supplement: Supplementary file 1 [file 37411996]

**Supplement Table 3:** Subgroup analyses on paediatric- and adult-onset MS - crude and adjusted OR, 95% confidence intervals and heterogeneity for having been breastfed compared to not having been breastfed on MS risk.

| **Included Studies** |  | **Pooled OR (95% CI), random effects model** | **Heterogeneity** |
| --- | --- | --- | --- |
| *Paediatric-onset MS (n=2a)* | Crude | 0.43 (0.15–1.23) | I² = 81.4% |
| *Adult-onset MS (n=15*b*)* | Crude | 0.85 (0.74–1.00) | I² = 64.5% |
| *Paediatric-onset MS (n=2a)* | Adjustedc | 0.53 (0.18–1.52) | I² = 68.2% |
| *Adult-onset MS (n=15*b*)* | Adjustedc | 0.88 (0.76–1.01) | I² = 47.1% |

a[20,21]

b[18-19, 22-32]
cIf adjusted OR were not available, crude OR were used instead
